# Supplementary material
Source: Springer Nature journal article supplement (https://www.springermedizin.de/resource/supplementary/12885_2010_2367_MOESM22_ESM.pdf/9461124)
Supplement: MOESM22 [file 9461124]

**Control**

**0.1 $\mu$ M dasatinib**

**0.1 $\mu$ M Eto**

**Dasatinib +  
etoposide**

**With DEAB**

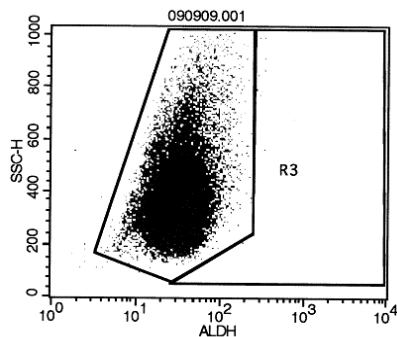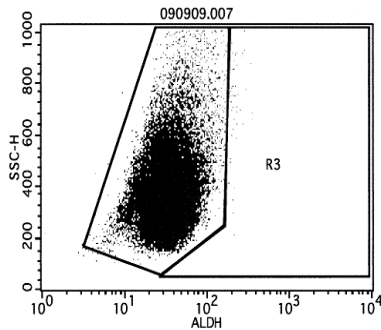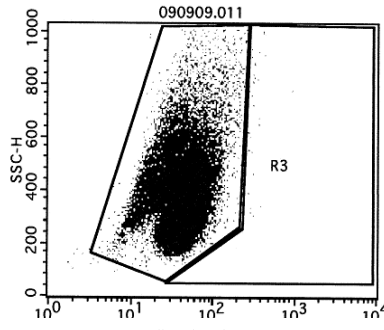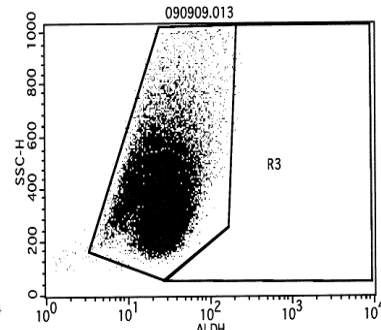

**Without DEAB**

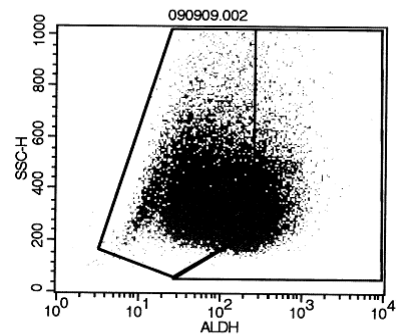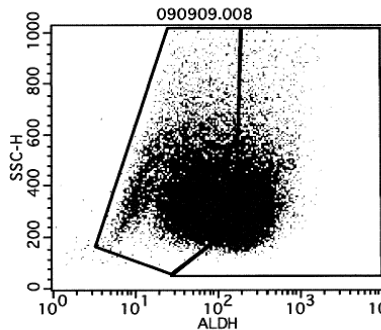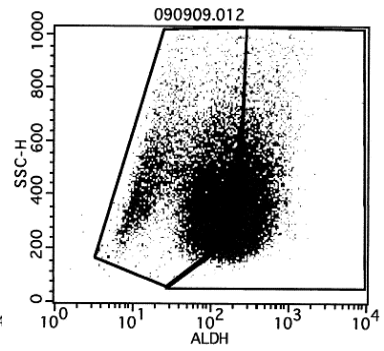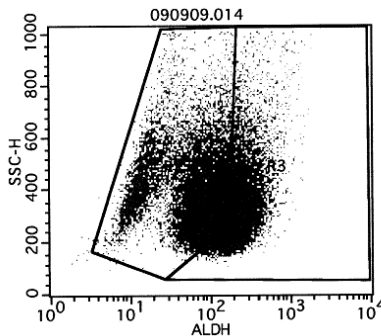

**The proportion of  
ALDH1-positive**

**24.4%**

**42.8%**

**38.5%**

**43.1%**
